# Supplementary material for: Identification of Sarcocystis and Trichinella Species in Muscles of Gray Wolf (Canis lupus) from Lithuania
Source: MDPI journal article supplement (doi:10.3390/vetsci11020085), 2024-02-10
Supplement: s1 [file s1]

**Table S1.** The primer pairs used for *Trichinella* species identification.

|                             |                                |
|-----------------------------|--------------------------------|
| <i>ES5</i> genetic regions  | 5'-GTTCCATGTGAACAGCAGT-3'      |
|                             | 5'-CGAAAACATACGACAACTGC-3'     |
| <i>ITS1</i> genetic regions | 5'-GCTACATCCTTTTGATCTGTT-3'    |
|                             | 5'-AGACACAATATCAACCACAGTACA-3' |

**Table S2.** PCR cycling conditions for *Trichinella* species identification.

| Temperature, °C |       | Time      |
|-----------------|-------|-----------|
| 95              |       | 5 min     |
| 94              | 45 s  | 5 cycles  |
| 58              | 45 s  |           |
| 68              | 1 min |           |
| 94              | 45 s  |           |
| 58              | 45 s  | 30 cycles |
| 72              | 1 min |           |
| 72              |       | 5 min     |
